# Supplementary material
Source: PubMed Central journal article supplement (PMC6485382)
Supplement: NIHMS78854-supplement-SFile.pdf [file NIHMS78854-supplement-SFile.pdf]

1 To interact with other cells, bacteria use contractile machines that function similar to membrane-  
2 puncturing bacteriophages. Some systems act in extracellular space, while others, including the  
3 type 6 secretion system (T6SS), function inside the cell. Here we used modern electron  
4 microscopy methods and functional assays to resolve the structure and function of a T6SS in the  
5 cellular context. We identified three modules and showed large-scale structural changes upon  
6 firing. T6SSs were organized in multi-barrel gun-like arrays and may contribute to the survival  
7 of bacteria inside their host. Sequence analyses suggested that T6SSs are more abundant than  
8 previously thought.
