# Supplementary material
Source: PubMed Central journal article supplement (PMC6485382)

**A**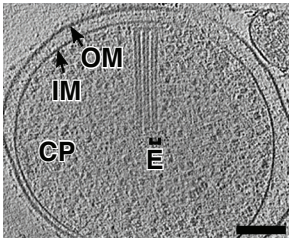**B**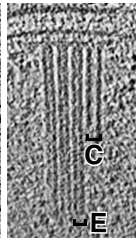**C**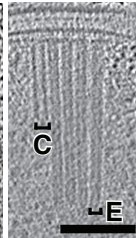

OM  
IM

**D**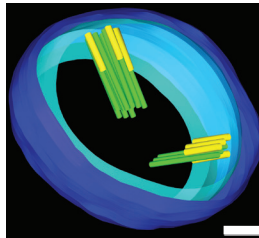**E**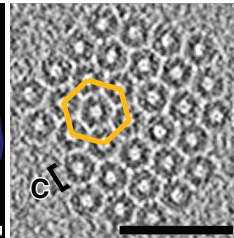**F**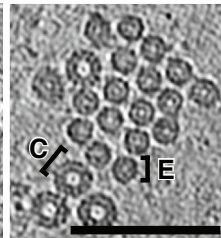

Supplement: NIHMS78854-supplement-SFig_1.pdf [file NIHMS78854-supplement-SFig_1.pdf]

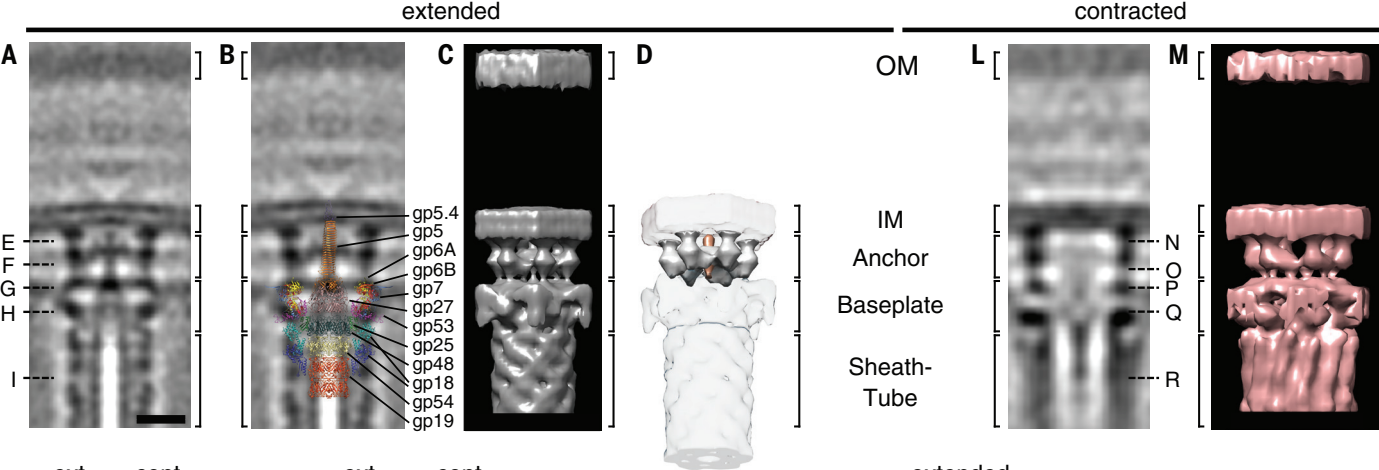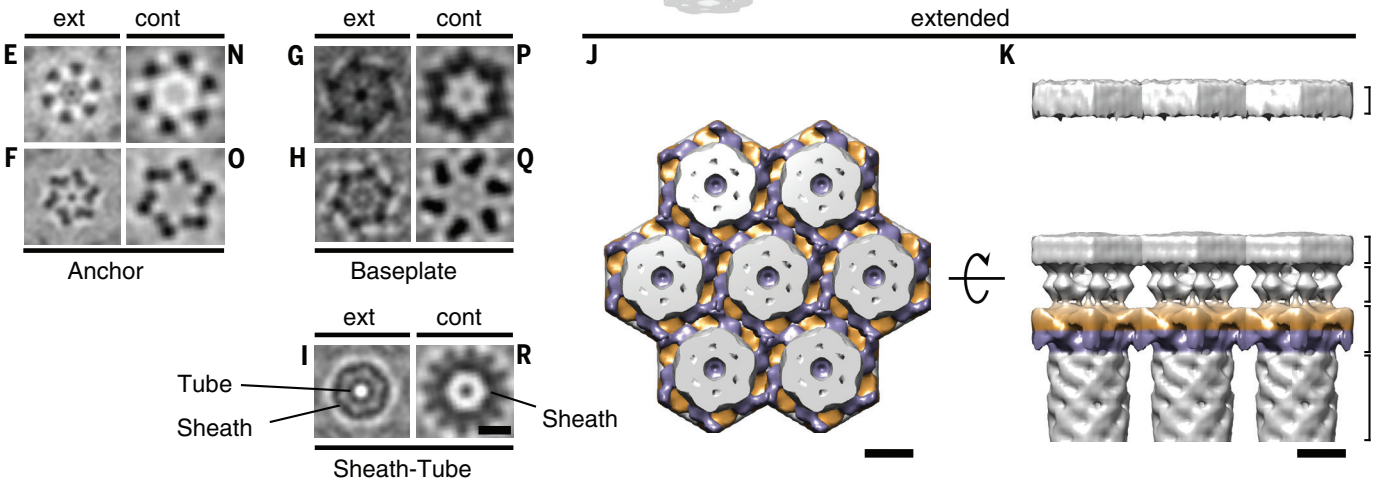

Supplement: NIHMS78854-supplement-SFig_2.pdf [file NIHMS78854-supplement-SFig_2.pdf]

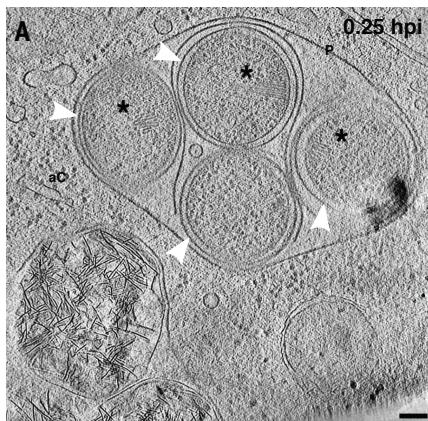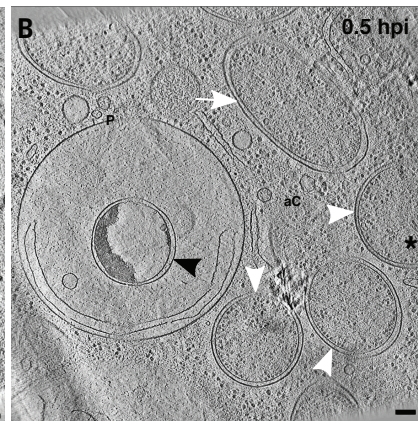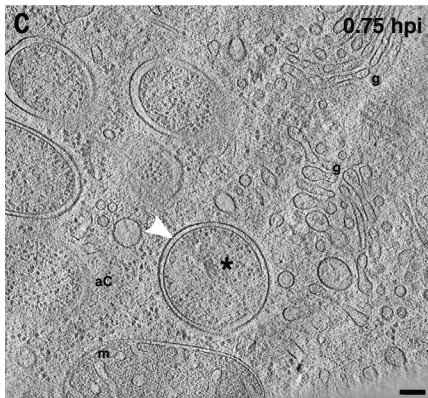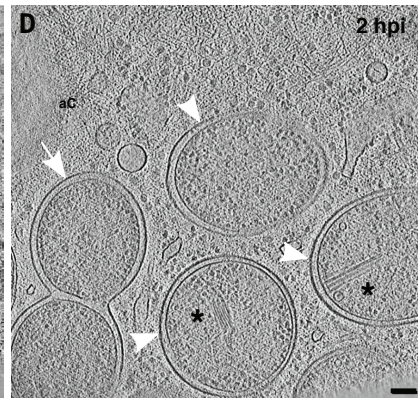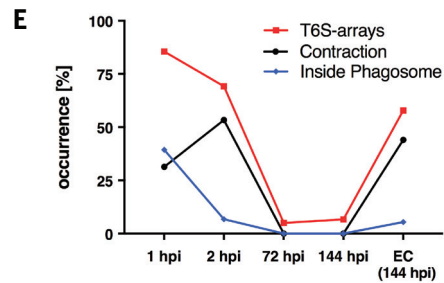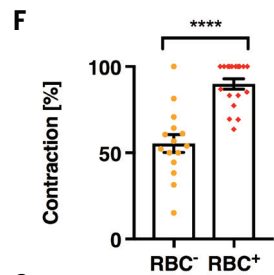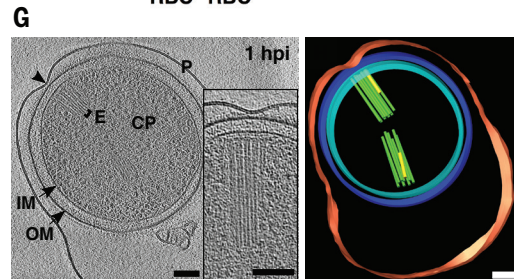

Supplement: NIHMS78854-supplement-SFig_3.pdf [file NIHMS78854-supplement-SFig_3.pdf]

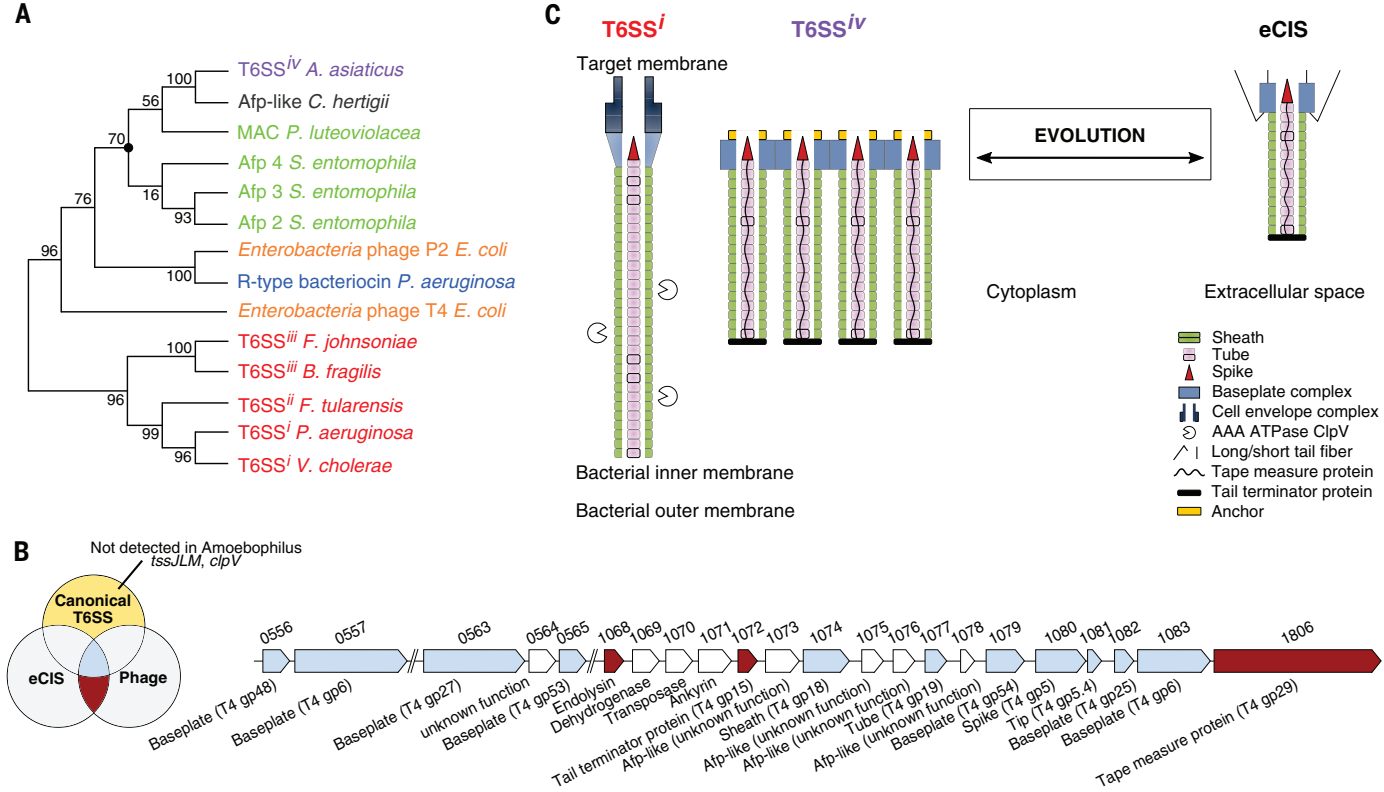

Supplement: NIHMS78854-supplement-SFig_4.pdf [file NIHMS78854-supplement-SFig_4.pdf]
